# Supplementary material
Source: PubMed Central journal article supplement (PMC10687305)
Supplement: NIHMS1906306-supplement-Supplementary_table.pdf [file NIHMS1906306-supplement-Supplementary_table.pdf]

Table S1. Questions from Wave 4 of the Population Assessment of Tobacco and Health (PATH) Study evaluated as part of a panel conditioning analysis among youth.

| Survey question label (Table 4) | Long description from W4 codebook                                                                                                                                                      | Values                                                                       |
|---------------------------------|----------------------------------------------------------------------------------------------------------------------------------------------------------------------------------------|------------------------------------------------------------------------------|
| Current Cigarette User          | Wave 4 youth respondents who have smoked a cigarette within the past 30 days.                                                                                                          | 1 = Yes<br>0 = No                                                            |
| Current E-product User          | Wave 4 youth respondents who have used an electronic nicotine product within the past 30 days.                                                                                         | 1 = Yes<br>0 = No                                                            |
| Current Any Tobacco User        | Wave 4 youth respondents who have used any tobacco product within the past 30 days.                                                                                                    | 1 = Yes<br>0 = No                                                            |
| Ever Cigarette User             | Wave 4 youth respondents who have ever smoked a cigarette.                                                                                                                             | 1 = Yes<br>0 = No                                                            |
| Ever E-product User             | Wave 4 youth respondents who have ever used any electronic nicotine products.                                                                                                          | 1 = Yes<br>0 = No                                                            |
| Thought Chemicals Often         | In the past 12 months, how often have you thought about the chemicals contained in tobacco products?                                                                                   | 1 = Often/very often<br>0 = Never/rarely/sometimes                           |
| Some Tobacco Safer              | Please tell me how much you agree or disagree with the statement: Some tobacco products are safer than others.                                                                         | 1 = Agree/strongly agree<br>0 = Strongly disagree/disagree/neither agree nor |
| Curious about E-products        | Have you ever been curious about using an electronic nicotine product? (Electronic nicotine products include e-cigarettes, vape pens, personal vaporizers and mods, e-                 | 1 = A little curious/somewhat curious/very curious<br>0 = Not at all curious |
| Curious about Hookah            | Have you ever been curious about smoking tobacco in a hookah?                                                                                                                          | 1 = A little curious/somewhat curious/very curious<br>0 = Not at all curious |
| Try E-product Soon              | Do you think that you will try an electronic nicotine product soon?                                                                                                                    | 1 = Probably not/probably yes/definitely yes<br>0 = Definitely not           |
| Try Hookah Soon                 | Do you think you will try smoking tobacco in a hookah soon?                                                                                                                            | 1 = Probably not/probably yes/definitely yes<br>0 = Definitely not           |
| Social Media                    | Sometimes people use the internet to connect with other people online through social networks like Facebook, Google Plus, YouTube, LinkedIn, Twitter, Tumblr, Instagram, Pinterest, or | 1 = Yes<br>0 = No                                                            |
| Health Good Excellent           | In general, would you say [Child's first name]'s overall health is excellent, very good, good, fair, or poor? (parent/guardian question)                                               | 1 = Very good/excellent<br>0 = Poor/fair/good                                |

Table S2. Questions from Wave 4 of the Population Assessment of Tobacco and Health (PATH) Study evaluated as part of a panel conditioning analysis among adults.

| Survey question label (Table 5) | Long description from W4 codebook                                                                                                                                           | Values            |
|---------------------------------|-----------------------------------------------------------------------------------------------------------------------------------------------------------------------------|-------------------|
| Current Cigarette User          | Wave 4 adult respondents who have smoked at least 100 cigarettes in their lifetime, and currently smoke every day or some days.                                             | 1 = Yes<br>0 = No |
| Current E-product User          | Wave 4 adult respondents who have ever used any electronic nicotine products, have ever used them fairly regularly, and currently use every day or some days.               | 1 = Yes<br>0 = No |
| Current Any Tobacco User        | Wave 4 adult respondents who have ever used any nicotine product, have ever used them fairly regularly, and currently use every day or some days.                           | 1 = Yes<br>0 = No |
| Ever Cigarette User             | Wave 4 adult respondents who have ever smoked a cigarette.                                                                                                                  | 1 = Yes<br>0 = No |
| Ever E-product User             | Wave 4 adult respondents who have ever used any electronic nicotine products.                                                                                               | 1 = Yes<br>0 = No |
| Ever High Blood Pressure        | Wave 4 adult respondents who have ever been told by a doctor, nurse or other health professional that they have high blood pressure.                                        | 1 = Yes<br>0 = No |
| Ever Lung Problem               | Wave 4 adult respondents who have ever been told by a doctor, nurse or other health professional that they had COPD, chronic bronchitis, emphysema, asthma or other lung or | 1 = Yes<br>0 = No |
